# Supplementary material for: Analysis of the Source Apportionment and Pathways of Heavy Metals in Soil in a Coal Mining Area Based on Machine Learning and an APCS-MLR Model
Source: MDPI journal article supplement (doi:10.3390/min14010054), 2023-12-31
Supplement: s1 [file s1]

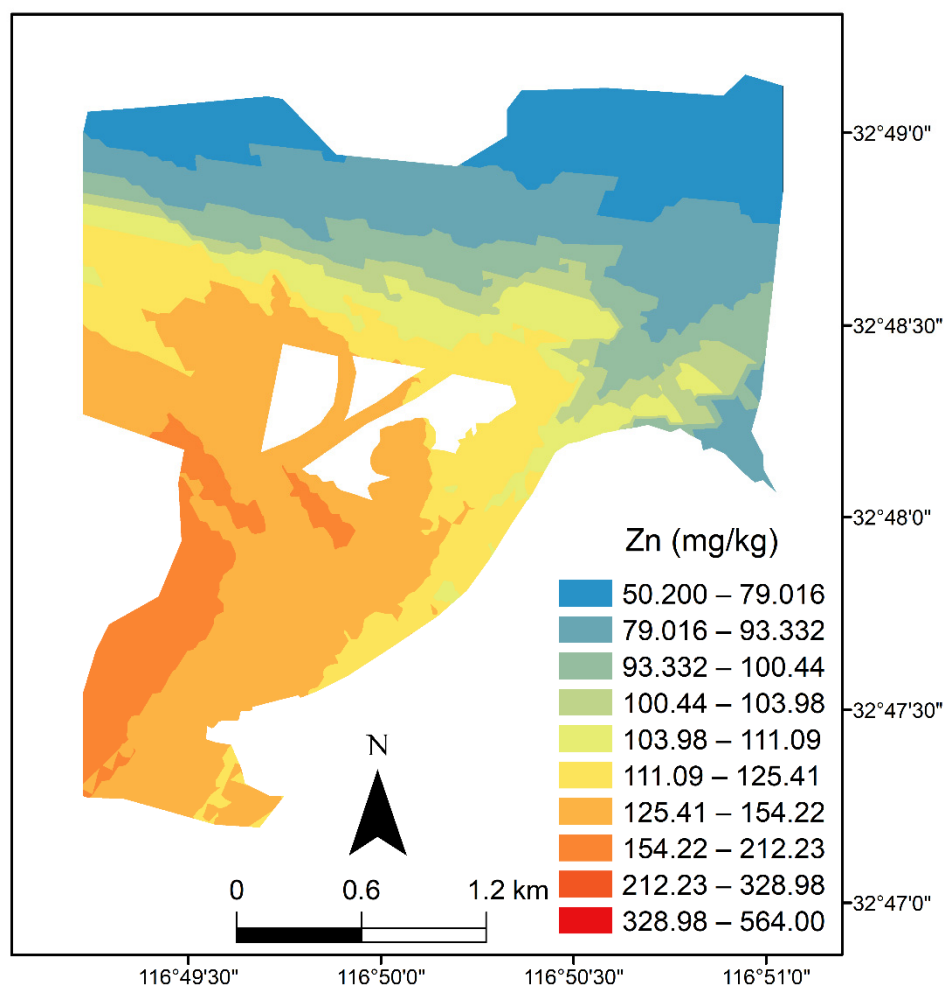

**Figure S1.** Spatial distribution prediction map of Zn content in the research area.

**Table S1** Comparison of predicted and actual values of the APCS-MLR model

| HMs   | Estimated value (E) | Measured value (O) | E/O    | R <sup>2</sup> |
|-------|---------------------|--------------------|--------|----------------|
| Cd    | 0.2781              | 0.2775             | 1.0020 | 0.906          |
| Zn    | 124.5185            | 124.5183           | 1.0000 | 0.997          |
| Cu    | 16.7212             | 16.7233            | 0.9999 | 0.804          |
| Cr    | 38.1463             | 38.1475            | 1.0000 | 0.916          |
| Pb    | 18.0221             | 18.0216            | 1.0000 | 0.662          |
| Ni    | 18.2554             | 18.2564            | 0.9999 | 0.894          |
| Total | -                   | -                  | -      | -              |

**Table S2 APCS-MLR modeling heavy metal pollution source contributions**

|    | PCA1     | PCA2     | PCA3     | UNKNOW   |
|----|----------|----------|----------|----------|
| Cd | 0.115156 | 0.685199 | 0.012633 | 0.187012 |
| Zn | 0.439785 | 0.117422 | 0.371815 | 0.070977 |
| Cu | 0.736707 | 0.20172  | 0.038253 | 0.023319 |
| Cr | 0.72595  | 0.025993 | 0.035664 | 0.212393 |
| Pd | 0.575516 | 0.364213 | 0.01072  | 0.04955  |
| Ni | 0.73587  | 0.072046 | 0.023475 | 0.168608 |
